# Supplementary material
Source: PubMed Central journal article supplement (PMC2635793)
Supplement: 0809294106_0809294106SI.pdf [file 0809294106_0809294106SI.pdf]

# Supporting Information

Shibuya *et al.* 10.1073/pnas.0809294106

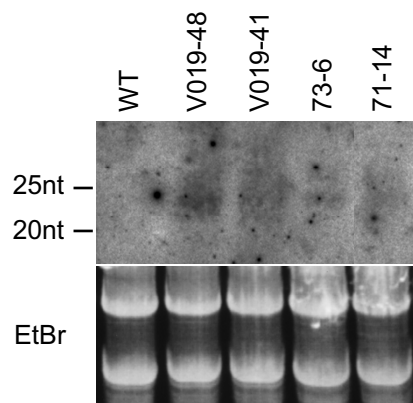

**Fig. S1.** Detection of small RNAs in transgenic plants. Enriched small RNAs are hybridized with the <sup>32</sup>P-labeled sense RNA probe transcribed from the 1701–1800 sequence of *pMADS3* intron 2. EtBr, ethidium bromide stained low-molecular-weight RNAs as a control for equal loading.

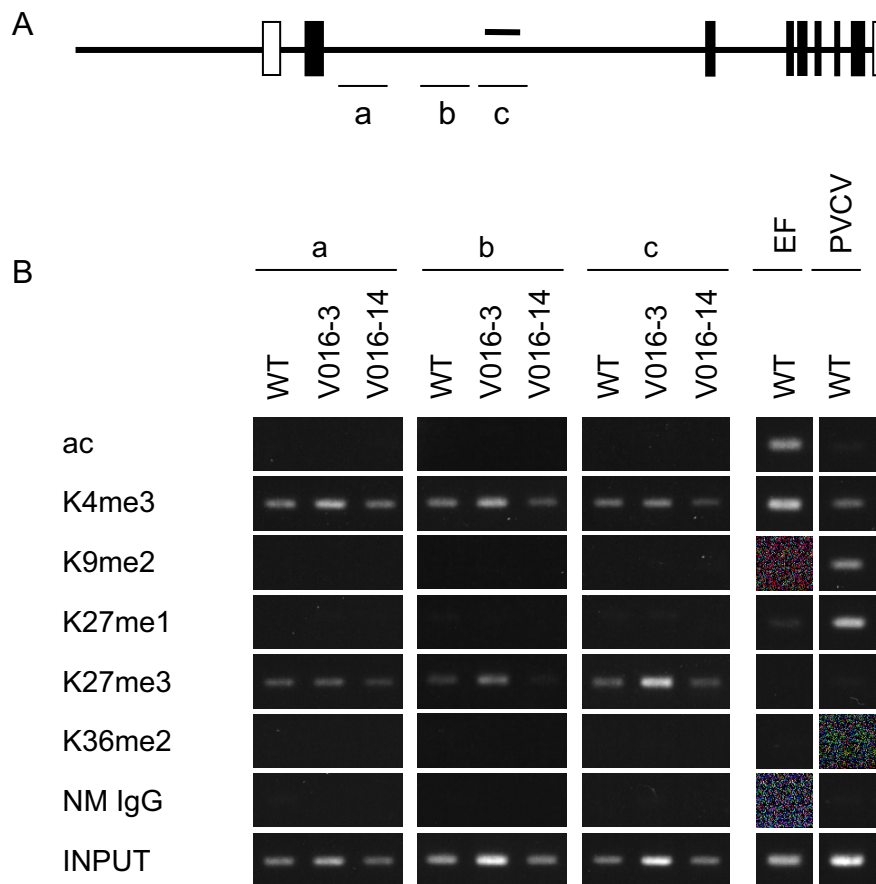

**Fig. S2.** Histone modifications at *pMADS3* locus of transformant plants. (A) Schematic of *pMADS3* locus showing the regions analyzed by ChIP. The *pMADS3* exons are indicated by boxes (filled, coding; open, noncoding). Bars (a–c) represent the regions analyzed by PCR after ChIP. The thick bar above intron 2 shows the region targeted by IR in V016 plants. (B) ChIP analysis with antibodies to acetylated H3, H3K4me3, H3K9me2, H3K27me1, H3K27me3, H3K36me2, and normal mouse IgG (NM IgG) as a negative control in wild-type (WT) and V016 plants. A euchromatin control (EF: elongation factor) reacted with antibodies to acetylated H3 and H3K4me3, and weakly with that to H3K27me1. A heterochromatin control (PVCV: petunia vein-clearing virus) reacted with antibodies to H3K9me2 and H3K27me1, and weakly with that to H3K4me3. Petals from floral buds (1–3 cm in length) were crosslinked with 0.1% formaldehyde and the chromatin fraction was extracted with EpiQuik plant ChIP kit (Epigentek). Immunoprecipitation was performed with antibodies to H3ac (Upstate no. 06-599), H3K4me3 (Abcam no. ab8580), H3K9me2 (Upstate no. 07-441), H3K27me1 (Upstate no. 07-448), and H3K36me2 (Upstate no. 07-369) by using EpiQuik plant ChIP kit (Epigentek) according to the manufacturer's instruction. The primers used in PCR for *pMADS3* intron2 are MI-1479F-ChIP (5'-ATTGGCTGCTGAAAATGGAC-3') and MI-1829R-ChIP (5'-AAAGAACCAACTGAGGAATGA-3'); those for EF are EF-77F-ChIP (5'-GCACTGTGATTGATGCTCCT-3') and EF-258R-ChIP (5'-TTGTTTGACACCAAGGGTGA-3'), and those for Petunia vein-clearing virus (PVCV) are PVCVb-60F (5'-CAACAAGCAACGAGCTTCAA-3') and PVCVb-333R (5'-TCACATGCCCATTTGTGAATC-3').





**Table S1. AG orthologs used for sequence alignment**

| Gene          | Species                        | Family         | GenBank accession no. |
|---------------|--------------------------------|----------------|-----------------------|
| <i>pMADS3</i> | <i>Petunia x hybrida</i>       | Solanaceae     | AB076051              |
| <i>CUM1</i>   | <i>Cucumis sativus</i>         | Cucurbitaceae  | AY254704              |
| <i>PPAG</i>   | <i>Prunus persica</i>          | Rosaceae       | EU072354              |
| <i>PTAG1</i>  | <i>Populus balsamifera</i>     | Salicaceae     | AF052570              |
| <i>PTAG2</i>  | <i>Populus balsamifera</i>     | Salicaceae     | AF052571              |
| <i>DP</i>     | <i>Ipomoea nil</i>             | Convolvulaceae | AB281192              |
| <i>FAR</i>    | <i>Antirrhinum majus</i>       | Veronicaceae   | AY935268              |
| <i>TAG1</i>   | <i>Lycopersicon esculentum</i> | Solanaceae     | AY254705              |
| <i>FcAG</i>   | <i>Fagopyrum cymosum</i>       | Polygonaceae   | AB089696              |
| <i>PLE</i>    | <i>Antirrhinum majus</i>       | Veronicaceae   | AY935269              |
| <i>CpPLE</i>  | <i>Carica papaya</i>           | Caricaceae     | EF645801              |
| <i>CrAG1</i>  | <i>Capsella rubella</i>        | Brassicaceae   | AY253263              |
| <i>CbAG1</i>  | <i>Capsella bursa-pastoris</i> | Brassicaceae   | AY253261              |
| <i>AG</i>     | <i>Arabidopsis thaliana</i>    | Brassicaceae   | AL021711              |
| <i>AsAG</i>   | <i>Aurinia saxatilis</i>       | Brassicaceae   | AY253249              |

**Table S2. Primers used for generation of inverted-repeat constructs**

| Constructs | Name                           | Sequence                                                                       |
|------------|--------------------------------|--------------------------------------------------------------------------------|
| V001       | MADSi2RNAi-1F<br>MADSi2RNAi-1R | CATGCCATGGGTAATCTTTAACAAAAAAATT<br>CGGGATCCATCGATCCCCAACAAATTTCTGGTTCT         |
| V002       | MADSi2RNAi-2F<br>MADSi2RNAi-2R | CATGCCATGGTGGGTGGTTGGTGTAAAGTTT<br>CGGGATCCATCGATCCAGATACTTTCTACTCCATA         |
| V003       | MADSi2RNAi-3F<br>MADSi2RNAi-3R | CATGCCATGGATTTTCATTACCTTTTGAAC<br>CGGGATCCATCGATCTATGTGTTCTTAACACCTGCTA        |
| V004       | MADSi2RNAi-4F<br>MADSi2RNAi-4R | CATGCCATGGCTAACTACAACCTACTGTG<br>CGGGATCCATCGATCTAGACCATAAAAAATGTTAG           |
| V005       | MI2RNAi-951F<br>MI2RNAi-1250R  | GACTAGTCCATGGTATACACTCTACTCTAGCTT<br>CGGGATCCATCGATTTCTTTGCTGTTTAAGTTCC        |
| V006       | MI2RNAi-951F<br>MI2RNAi-1500R  | GACTAGTCCATGGTATACACTCTACTCTAGCTT<br>CGGGATCCATCGATCCGTCATTTTCAGCAGCCA         |
| V007       | MI2RNAi-1251F<br>MI2RNAi-1700R | GACTAGTCCATGGACAGAAGTGGAAAGAAAGAGA<br>CGGGATCCATCGATAACGGTTCAGATCTATGCCA       |
| V008       | MI2RNAi-1501F<br>MI2RNAi-1800R | GACTAGTCCATGGTTGTGATGTGATCAGATGAG<br>CGGGATCCATCGATTTTCTAGTCTACTTACAAC         |
| V009       | MI2RNAi-1501F<br>MI2RNAi-2050R | GACTAGTCCATGGTTGTGATGTGATCAGATGAG<br>CGGGATCCATCGATTAGAAAGAGTGCCTTAACCA        |
| V010       | MI2RNAi-1801F<br>MI2RNAi-2050R | GACTAGTCCATGGTGAGAGTCATTCTCAGTGT<br>CGGGATCCATCGATTAGAAAGAGTGCCTTAACCA         |
| V015       | MI2RNAi-1501F<br>MI2RNAi-1700R | GACTAGTCCATGGTTGTGATGTGATCAGATGAG<br>CGGGATCCATCGATAACGGTTCAGATCTATGCCA        |
| V016       | MI2RNAi-1601F<br>MI2RNAi-1800R | GACTAGTCCATGGTGCCTTTGAAACAAAACCT<br>CGGGATCCATCGATTTTCTAGTCTACTTACAAC          |
| V017       | MI2RNAi-1501F<br>MI2RNAi-1600R | GACTAGTCCATGGTTGTGATGTGATCAGATGAG<br>CGGGATCCATCGATTTTATCAATAATCTATAAT         |
| V018       | MI2RNAi-1601F<br>MI2RNAi-1700R | GACTAGTCCATGGTGCCTTTGAAACAAAACCT<br>CGGGATCCATCGATAACGGTTCAGATCTATGCCA         |
| V019       | MI2RNAi-1701F<br>MI2RNAi-1800R | GACTAGTCCATGGGAAACAGTGGACCAATCATA<br>CGGGATCCATCGATTTTCTAGTCTACTTACAAC         |
| V032       | MI2RNAi-1251F<br>MI2RNAi-1400R | GACTAGTCCATGGACAGAAGTGGAAAGAAAGAGA<br>CGGGATCCATCGATTCTTTCTCAACACCCACCCAT      |
| V033       | MI2RNAi-1601F<br>MI2RNAi-1767R | GACTAGTCCATGGTGCCTTTGAAACAAAACCT<br>CGGGATCCATCGATATATATATAGCTACTGATTAGCTGCTT  |
| V034       | MI2RNAi-1768F<br>MI2RNAi-1900R | GACTAGTCCATGGATATATATCGACGAAATTAAGGTTGTAA<br>CGGGATCCATCGATTGACTCAATCTGTCTACTC |
